# Supplementary material for: Recognizing novel drugs against Keap1 in Alzheimer’s disease using machine learning grounded computational studies
Source: Front Mol Neurosci. 2022 Dec 6;15:1036552. doi: 10.3389/fnmol.2022.1036552 (PMC9764216; doi:10.3389/fnmol.2022.1036552)
Supplement: Supplementary file 1 [file Data_Sheet_1.xlsx]

## Sheet: data
mol	DrugBank_ID	Similarity_Score	Usual_Name	pIC50pred_2	IC50
	DB06841	0.005	[(2R)-1-[(2S)-2-[[(2S,3S)-1-Chloro-6-(diaminomethylideneamino)-2-hydroxyhexan-3-yl]carbamoyl]pyrrolidin-1-yl]-1-oxo-3-phenylpropan-2-yl]azanium	7.09118	81.0618
	DB04310	0.015	2-[(Formyl-Hydroxy-Amino)-Methyl]-Heptanoic Acid [1-(2-Hydroxymethyl-Pyrrolidine-1-Carbonyl)-2-Methyl-Propyl]-Amide	6.90087	125.642
	DB11784	0.005	NRX-1074	6.80016	158.433
	DB12730	0.004	Dolastatin 10	6.76896	170.23
	DB12677	0.007	Soblidotin	6.75644	175.211
	DB14822	0.003	SB-649868	6.65594	220.83
	DB00337	0.006	Pimecrolimus	6.43729	365.351
	DB06401	0.003	Bazedoxifene	6.25455	556.482
	DB05414	0.003	Pipendoxifene	6.25455	556.482
	DB08344	0.007	4-chloro-N-(3-methoxypropyl)-N-[(3S)-1-(2-phenylethyl)piperidin-3-yl]benzamide	6.18242	657.018
	DB01630	0.004	SC-74020	6.14098	722.805
	DB09170	0.005	??-Hydroxythiofentanyl	6.05524	880.558
	DB04852	0.007	Implitapide	6.05	891.257
	DB01621	0.006	Pipotiazine	6.04098	909.957
	DB13950	0.002	WIN 55212-2	6.01708	961.433
	DB01529	0.004	Dextromoramide	6.01526	965.482
	DB02848	0.003	"{4-[3-(6	6.01379	968.737
	DB16243	0.003	TBA-7371	6.01044	976.259
	DB02090	0.013	A Disubstituted Succinyl Caprolactam Hydroxymate Mmp3inhibitor	6.00776	982.284
	DB16319	0.005	GSK-2981278	6.0002	999.53
	DB14868	0.004	AZD-8848	5.98788	1028.31
	DB07006	0.003	"9-HYDROXY-6-(3-HYDROXYPROPYL)-4-(2-METHOXYPHENYL)PYRROLO[3	5.98107	1044.55
	DB12101	0.003	CC-220	5.97509	1059.03
	DB16037	0.003	BI 44370 TA	5.9547	1109.94
	DB01453	0.006	Beta-hydroxyfentanyl	5.94898	1124.65
	DB12318	0.003	BMS-599626	5.93749	1154.82
	DB00317	0.003	Gefitinib	5.93709	1155.86
	DB04191	0.007	Skf 107457	5.93174	1170.2
	DB12887	0.004	Tazemetostat	5.92671	1183.82
	DB01570	0.006	Ohmefentanyl	5.91691	1210.84
	DB14727	0.003	Riboflavin tetrabutyrate	5.9002	1258.34
	DB08966	0.004	Fursultiamine	5.87681	1327.99
	DB08916	0.003	Afatinib	5.86731	1357.34
	DB11958	0.003	Brivanib	5.81633	1526.41
	DB14895	0.004	Vibegron	5.81075	1546.14
	DB06212	0.005	Tolvaptan	5.80544	1565.15
	DB12685	0.007	K-134	5.80381	1571.04
	DB12203	0.004	Tozadenant	5.79655	1597.54
	DB16256	0.006	Ningetinib	5.79208	1614.07
	DB00975	0.005	Dipyridamole	5.7905	1619.93
	DB00220	0.004	Nelfinavir	5.78824	1628.4
	DB11974	0.005	PF-04691502	5.78283	1648.81
	DB07563	0.006	"1-{7-cyclohexyl-6-[4-(4-methylpiperazin-1-yl)benzyl]-7H-pyrrolo[2	5.77885	1664
	DB11986	0.006	Entrectinib	5.77818	1666.54
	DB07463	0.004	"(3R	5.77585	1675.51
	DB06575	0.005	Valomaciclovir	5.77359	1684.28
	DB04609	0.004	INHIBITOR Q8467 OF DUPONT MERCK	5.76936	1700.73
	DB08489	0.003	"N4-HYDROXY-2-ISOBUTYL-N1-(9-OXO-1	5.76544	1716.16
	DB12046	0.003	Atopaxar	5.76266	1727.19
	DB13239	0.005	Neltenexine	5.75196	1770.26
	DB11912	0.004	Lanopepden	5.74699	1790.63
	DB11468	0.012	Tiamulin	5.74577	1795.68
	DB13019	0.003	Henatinib	5.73931	1822.59
	DB01611	0.007	Hydroxychloroquine	5.73816	1827.41
	DB12570	0.005	CC-223	5.7342	1844.18
	DB07654	0.003	"(5	5.73399	1845.07
	DB16074	0.004	LY2828360	5.7336	1846.7
	DB12167	0.004	LY-3023414	5.73241	1851.79
	DB00601	0.003	Linezolid	5.72777	1871.67
	DB02673	0.005	"(4aS	5.72105	1900.87
	DB04021	0.016	MF268	5.71298	1936.5
	DB12825	0.014	Lefamulin	5.71109	1944.95
	DB13022	0.004	LY-2874455	5.70892	1954.7
	DB01256	0.01	Retapamulin	5.70457	1974.36
	DB08590	0.003	1-(3-HYDROXYPROPYL)-2-[(3-NITROBENZOYL)AMINO]-1H-BENZIMIDAZOL-5-YL PIVALATE	5.70176	1987.19
	DB11798	0.005	Tanzisertib	5.69906	1999.58
	DB02495	0.007	9-(4-hydroxybutyl)-N2-phenylguanine	5.69412	2022.45
	DB06480	0.005	Prucalopride	5.69258	2029.64
	DB05450	0.169	Smilagenin	5.69042	2039.77
	DB16216	0.003	Lazertinib	5.68976	2042.87
	DB06897	0.005	"3-[3-chloro-5-(5-{[(1S)-1-phenylethyl]amino}isoxazolo[5	5.68758	2053.13
	DB08309	0.005	3-({2-[(4-{[6-(CYCLOHEXYLMETHOXY)-9H-PURIN-2-YL]AMINO}PHENYL)SULFONYL]ETHYL}AMINO)PROPAN-1-OL	5.68707	2055.54
	DB00481	0.003	Raloxifene	5.68416	2069.38
	DB01505	0.005	Etoxeridine	5.6824	2077.76
	DB13436	0.006	Droxypropine	5.68181	2080.61
	DB00247	0.005	Methysergide	5.67829	2097.55
	DB13471	0.004	Nalfurafine	5.67728	2102.44
	DB03381	0.062	Hexadecanal	5.67609	2108.21
	DB13588	0.013	Naftidrofuryl	5.67392	2118.76
	DB08752	0.007	N-[(1S)-2-[(4-cyano-1-methylpiperidin-4-yl)amino]-1-(cyclohexylmethyl)-2-oxoethyl]morpholine-4-carboxamide	5.67344	2121.07
	DB12446	0.01	Derenofylline	5.67212	2127.55
	DB00905	0.013	Bimatoprost	5.66798	2147.94
	DB13203	0.004	Bamifylline	5.66777	2148.98
	DB13395	0.005	Eprozinol	5.66574	2159.02
	DB00802	0.005	Alfentanil	5.66518	2161.81
	DB02243	0.003	4-Morpholin-4-Yl-Piperidine-1-Carboxylic Acid [1-(3-Benzenesulfonyl-1-Propyl-Allylcarbamoyl)-2-Phenylethyl]-Amide	5.6636	2169.7
	DB02339	0.007	Allyl-{6-[3-(4-Bromo-Phenyl)-Benzofuran-6-Yloxy]-Hexyl-}-Methyl-Amin	5.66225	2176.45
	DB16031	0.386	TRO40303	5.66088	2183.35
	DB03932	0.008	LFA703	5.65996	2187.95
	DB12013	0.008	Axelopran	5.65776	2199.09
	DB16064	0.004	LY-3200882	5.65724	2201.73
	DB13012	0.351	AQX-1125	5.65506	2212.8
	DB13605	0.01	Phenoperidine	5.65263	2225.19
	DB11881	0.003	AUY922	5.65193	2228.81
	DB12884	0.005	Lavoltidine	5.64731	2252.61
	DB07848	0.003	5-Chloro-N-{(3S)-1-[(2S)-1-(4-morpholinyl)-1-oxo-2-propanyl]-2-oxo-3-pyrrolidinyl}-1H-indole-2-sulfonamide	5.64689	2254.82
	DB12796	0.003	MRX-I	5.6436	2271.96
	DB00654	0.018	Latanoprost	5.64241	2278.21
	DB07889	0.003	"(2S)-1-(Dimethylamino)-3-(4-{[4-(2-methylimidazo[1	5.64051	2288.19
	DB15490	0.033	Zuranolone	5.64028	2289.38
	DB15670	0.004	Gusacitinib	5.63816	2300.57
	DB07280	0.003	5-[4-(DIMETHYLAMINO)PHENYL]-6-[(6-MORPHOLIN-4-YLPYRIDIN-3-YL)ETHYNYL]PYRIMIDIN-4-AMINE	5.63652	2309.29
	DB15830	0.039	Ruscogenin	5.63425	2321.39
	DB14835	0.004	SUVN-G3031	5.63046	2341.75
	DB16335	0.004	Sulopenem Etzadroxil	5.62664	2362.41
	DB13077	0.003	LCB01-0371	5.62432	2375.06
	DB01253	0.004	Ergometrine	5.62405	2376.59
	DB03882	0.986	"5-Alpha-Androstane-3-Beta	5.62256	2384.72
	DB03926	0.986	"5alpha-androstane-3beta	5.62256	2384.72
	DB01530	0.985	"5alpha-androstane-3alpha	5.62256	2384.72
	DB11770	0.005	Talinolol	5.62086	2394.07
	DB01487	0.007	Embutramide	5.61103	2448.92
	DB16351	0.005	Volinanserin	5.60929	2458.73
	DB01503	0.183	1-Androstenediol	5.60775	2467.47
	DB13487	0.114	Iodine (131I) norcholesterol	5.60708	2471.27
	DB14723	0.003	Larotrectinib	5.60612	2476.71
	DB01070	0.122	Dihydrotachysterol	5.60248	2497.57
	DB12972	0.769	Sepranolone	5.60212	2499.67
	DB11967	0.003	Binimetinib	5.60158	2502.77
	DB16160	0.003	ASTX660	5.59678	2530.59
	DB07678	0.03	"(9ALPHA	5.59285	2553.59
	DB08067	0.003	4-[(2-{4-[(CYCLOPROPYLCARBAMOYL)AMINO]-1H-PYRAZOL-3-YL}-1H-BENZIMIDAZOL-6-YL)METHYL]MORPHOLIN-4-IUM	5.59272	2554.34
	DB13040	0.003	Gandotinib	5.59218	2557.54
	DB13784	0.004	Dixyrazine	5.58602	2594.08
	DB13840	0.003	Hydroxyethylpromethazine	5.58548	2597.31
	DB15096	0.006	18-methoxycoronaridine	5.5843	2604.38
	DB08956	0.712	Hydroxydione	5.58171	2619.93
	DB02342	0.026	2-Methoxyestradiol	5.58026	2628.71
	DB00212	0.006	Remikiren	5.58021	2629.03
	DB00288	0.009	Amcinonide	5.577	2648.48
	DB12858	0.003	LY-377604	5.57686	2649.36
	DB08701	0.003	"2-(3-BROMOPHENYL)-6-[(2-HYDROXYETHYL)AMINO]-1H-BENZO[DE]ISOQUINOLINE-1	5.57492	2661.22
	DB14555	0.399	Ursadiol	5.57369	2668.74
	DB05812	0.017	Abiraterone	5.57123	2683.92
	DB06412	0.085	Oxymetholone	5.56786	2704.85
	DB08393	0.002	"2-[(5	5.56678	2711.55
	DB01524	0.212	Androstenediol	5.56634	2714.3
	DB01455	0.209	19-Nor-5-androstenediol	5.56634	2714.3
	DB04938	0.006	Ospemifene	5.56594	2716.81
	DB00769	0.015	Hydrocortamate	5.56473	2724.38
	DB15688	0.003	Vazegepant	5.56403	2728.8
	DB15321	0.006	Tefinostat	5.56207	2741.14
	DB14544	0.019	Hydrocortisone valerate	5.56023	2752.75
	DB14543	0.02	Hydrocortisone probutate	5.55926	2758.95
	DB12622	0.793	Lupeol	5.55925	2758.96
	DB07655	0.003	"3-AMINO-3-BENZYL-[4.3.0]BICYCLO-1	5.55737	2770.96
	DB06693	0.02	Mevastatin	5.55689	2774.01
	DB05239	0.006	Cobimetinib	5.55557	2782.49
	DB04706	0.16	7beta-hydroxycholesterol	5.55519	2784.91
	DB07766	0.003	"(2Z	5.55299	2799.05
	DB01513	1	Main drug (17-Methyl-5alpha-androstane-3beta,17beta-diol)	5.55279	2800.34
	DB13564	0.004	Zipeprol	5.55186
	DB14541	0.019	Hydrocortisone cypionate	5.55069
	DB12341	0.005	LY-2456302	5.54843
	DB01130	0.014	Prednicarbate	5.54634
	DB14596	0.013	Loteprednol etabonate	5.54634
	DB04540	0.262	Cholesterol	5.54607
	DB13797	0.098	Iodocholesterol (131I)	5.54607
	DB00169	0.145	Cholecalciferol	5.54535
	DB06809	0.003	Plerixafor	5.54487
	DB07167	0.003	5-CYANO-FURAN-2-CARBOXYLIC ACID [5-HYDROXYMETHYL-2-(4-METHYL-PIPERIDIN-1-YL)-PHENYL]-AMIDE	5.54387
	DB16033	0.005	GSK2798745	5.54234
	DB02789	0.106	Pregnenolone	5.54111
	DB12499	0.022	Clascoterone	5.54074
	DB11950	0.004	Teneligliptin	5.53786
	DB07792	0.003	"(S)-2-CHLORO-N-(1-(2-(2-HYDROXYETHYLAMINO)-2-OXOETHYL)-2-OXO-1	5.53623
	DB01526	0.184	4-Androstenediol	5.53604
	DB01554	0.179	Bolandiol	5.53604
	DB13554	0.006	Moperone	5.53499
	DB11689	0.003	Selumetinib	5.53454
	DB02300	0.062	Calcipotriol	5.53425
	DB04732	0.004	N-(4-MORPHOLINE)CARBONYL-B-(1-NAPHTHYL)-L-ALANINE-L-LEUCINE BORONIC ACID	5.53349
	DB00153	0.108	Ergocalciferol	5.53348
	DB08582	0.003	"N-(4-bromo-2-{[(3R	5.53075
	DB12401	0.006	Bromperidol	5.52976
	DB12415	0.02	Galeterone	5.52818
	DB01513	0.987	"17Alpha-methyl-3beta	5.5264
	DB01479	0.985	BA-2664	5.5264
	DB06307	0.724	Apoptone	5.5264
	DB06781	0.01	Difluprednate	5.52419
	DB01224	0.003	Quetiapine	5.52294
	DB00227	0.02	Lovastatin	5.52072
	DB15999	0.018	Prednisolone caproate	5.52025
	DB00353	0.005	Methylergometrine	5.51922
	DB08092	0.003	3-fluoro-N-1H-indol-5-yl-5-morpholin-4-ylbenzamide	5.5169
	DB04038	0.102	Ergosterol	5.51683
	DB12196	0.005	CP-866087	5.51469
	DB06702	0.006	Fesoterodine	5.51384
	DB05549	0.003	INO-1001	5.51376
	DB12752	0.003	Bucindolol	5.51113
	DB05212	0.06	HE3286	5.51021
	DB14038	0.218	beta-Sitosterol	5.50978
	DB14634	0.012	Fluprednidene acetate	5.5076
	DB14881	0.005	Oliceridine	5.50661
	DB12459	0.003	Belotecan	5.50488
	DB15205	0.003	Capromorelin	5.50416
	DB04705	0.284	25-Hydroxycholesterol	5.50346
	DB05104	0.005	Asimadoline	5.50327
	DB11968	0.003	MK-7145	5.50169
	DB06444	0.008	Dexanabinol	5.49975
	DB15614	0.065	Previtamin D(3)	5.49809
	DB01669	0.004	Virginiamycin M1	5.49583
	DB03395	0.005	Enalkiren	5.49416
	DB13097	0.092	1alpha-Hydroxyvitamin D5	5.49384
	DB08091	0.003	3-FLUORO-5-MORPHOLIN-4-YL-N-[3-(2-PYRIDIN-4-YLETHYL)-1H-INDOL-5-YL]BENZAMIDE	5.49362
	DB07194	0.003	"2-{2-[(3	5.49201
	DB00910	0.1	Paricalcitol	5.49021
	DB12774	0.003	AZD-8055	5.48697
	DB00641	0.021	Simvastatin	5.48599
	DB03696	0.369	Lanosterol	5.48533
	DB01436	0.135	Alfacalcidol	5.48509
	DB04865	0.005	Omacetaxine mepesuccinate	5.48377
	DB04796	0.079	Inecalcitol	5.4812
	DB05410	0.01	NCX 1022	5.48112
	DB00146	0.196	Calcifediol	5.47675
	DB06117	0.064	"1alpha	5.47495
	DB16406	0.003	Subasumstat	5.47438
	DB02699	0.015	4-Oxoretinol	5.4741
	DB13689	0.093	Tacalcitol	5.47322
	DB06410	0.093	Doxercalciferol	5.47322
	DB06471	0.005	Naxifylline	5.47303
	DB14632	0.02	Prednisolone tebutate	5.47244
	DB00162	0.024	Vitamin A	5.47196
	DB12832	0.009	Prednimustine	5.47102
	DB01474	0.186	"17alpha-methyl-3beta	5.47079
	DB08742	0.031	"1	5.46958
	DB06191	0.004	Zosuquidar	5.46866
	DB15440	0.005	GSK-3117391	5.46673
	DB00588	0.007	Fluticasone propionate	5.46632
	DB14083	0.005	Bisphenol A diglycidyl ether	5.46601
	DB03288	0.003	5-Chloro-1h-Indole-2-Carboxylic Acid{[Cyclopentyl-(2-Hydroxy-Ethyl)-Carbamoyl]-Methyl}-Amide	5.46164
	DB09209	0.004	Pholcodine	5.45942
	DB15257	0.004	Milademetan	5.45927
	DB13866	0.101	Etynodiol	5.459
	DB14945	0.005	Florbenazine F-18	5.45865
	DB15557	0.15	"24-Homo-1	5.45672
	DB05137	0.016	Lobeline	5.45548
	DB04891	0.105	Becocalcidiol	5.45288
	DB07943	0.004	SD-0006	5.45272
	DB08328	0.006	PANTOTHENYL-AMINOETHANOL-11-PIVALIC ACID	5.45258
	DB11669	0.005	Ortataxel	5.45163
	DB01063	0.004	Acetophenazine	5.45046
	DB01548	0.007	Diprenorphine	5.44803
	DB00921	0.007	Buprenorphine	5.44803
	DB07521	0.004	"(3Z	5.44635
	DB05626	0.004	Retaspimycin	5.441
	DB11778	0.003	Danusertib	5.44086
	DB15968	0.009	Butropium	5.4396
	DB11759	0.005	Pevonedistat	5.43371
	DB13512	0.003	Clefamide	5.43242
	DB04613	0.003	"(E)-(4S	5.42788
	DB04177	0.029	Digitoxigenin	5.42671
	DB11454	0.019	Prostalene	5.42067
	DB00136	0.137	Calcitriol	5.41674
	DB01608	0.01	Periciazine	5.4157
	DB01480	0.005	Cyprenorphine	5.4157
	DB12144	0.005	BMS-275183	5.41247
	DB14152	0.626	Ginsenosides	5.41118
	DB05695	0.004	NPS-2143	5.40794
	DB01038	0.004	Carphenazine	5.40203
	DB02704	0.007	"(2R	5.39772
	DB04704	0.37	20-hydroxycholesterol	5.39733
	DB07627	0.005	(2S)-4-METHYL-2-(3-PHENYLTHIOUREIDO)-N-((3S)-TETRAHYDRO-2-HYDROXY-3-FURANYL)PENTANAMIDE	5.38885
	DB02253	0.053	"(1r)-4-[(1e	5.38565
	DB12930	0.006	Opipramol	5.37761
	DB08622	0.005	"4-(4-CHLORO-PHENYL)-1-{3-[2-(4-FLUORO-PHENYL)-[1	5.37198
	DB00424	0.011	Hyoscyamine	5.36485
	DB07465	0.027	"(1S	5.36213
	DB03383	0.004	CP-320626	5.35536
	DB15578	0.006	Desfesoterodine	5.35135
	DB00393	0.004	Nimodipine	5.35108
	DB12464	0.004	Bevenopran	5.35054
	DB14061	0.003	Hycanthone	5.34886
	DB00836	0.007	Loperamide	5.34881
	DB13078	0.005	KOSN-1724	5.34595
	DB15821	0.016	Fluocortolone caproate	5.34111
	DB08095	0.004	"3-(2-CHLOROPHENYL)-1-(2-{[(1S)-2-HYDROXY-1	5.3375
	DB00224	0.004	Indinavir	5.33582
	DB03181	0.003	"2-[4-(4-Hydroxy-3-Isopropyl-Phenoxy)-3	5.33312
	DB13648	0.005	Alcuronium	5.33156
	DB06194	0.042	Elocalcitol	5.31717
	DB09026	0.008	Aliskiren	5.31618
	DB00850	0.005	Perphenazine	5.31532
	DB16118	0.003	Capadenoson	5.31443
	DB12322	0.009	GW-870086	5.30933
	DB14653	0.011	Clocortolone caproate	5.30077
	DB00502	0.006	Haloperidol	5.29039
	DB00598	0.004	Labetalol	5.28692
	DB01196	0.011	Estramustine	5.26375
	DB11431	0.007	Moxidectin	5.26049
	DB01450	0.005	Dihydroetorphine	5.25729
	DB07571	0.004	"N~2~-[(BENZYLOXY)CARBONYL]-N-[(1S	5.2534
	DB15777	0.014	Fluocortolone pivalate	5.25312
	DB12541	0.007	SAR-405838	5.25006
	DB07747	0.004	"(3R)-N-(4-CHLOROPHENYL)-3-(HYDROXYMETHYL)-1	5.25
	DB01102	0.005	Arbutamine	5.24984
	DB07264	0.003	(S)-N-(1-(3-CHLORO-4-FLUOROPHENYL)-2-HYDROXYETHYL)-4-(4-(3-CHLOROPHENYL)-1H-PYRAZOL-3-YL)-1H-PYRROLE-2-CARBOXAMIDE	5.22641
	DB01624	0.004	Zuclopenthixol	5.22059
	DB13841	0.004	Clopenthixol	5.22059
	DB12517	0.005	PF-00446687	5.19087
	DB14652	0.012	Clocortolone acetate	5.17953
	DB06597	0.015	Estradiol sulfamate	5.14959
	DB14941	0.007	BMS-817399	5.14053
	DB13952	0.022	Estradiol acetate	5.13635
	DB13953	0.012	Estradiol benzoate	5.10392
	DB08954	0.007	Ifenprodil	5.04321
	DB04042	0.006	"2-[4-(Hydroxy-Methoxy-Methyl)-Benzyl]-7-(4-Hydroxymethyl-Benzyl)-1	4.95217
	DB11809	0.011	Artefenomel	4.93131
	DB00342	0.017	Terfenadine	4.90875
	DB16070	0.005	KZR-616	4.87726
	DB00308	0.012	Ibutilide	4.87089
	DB03742	0.003	Compound 4-D	4.84192
	DB03276	0.005	"4-[(10s	4.82258
	DB08546	0.007	"4-[(3AS	4.81057
	DB02872	0.004	"Cis-[4	4.79505
	DB06708	0.003	Lumefantrine	4.77782
	DB00973	0.008	Ezetimibe	4.74254
	DB08003	0.003	ISOTHIAZOLIDINONE ANALOG	4.69428
	DB12218	0.004	Capivasertib	4.65422
	DB12869	0.005	Eliprodil	4.64566
	DB07258	0.003	(R)-pyridin-4-yl[4-(2-pyrrolidin-1-ylethoxy)phenyl]methanol	4.52874
	DB15052	0.013	Ansofaxine	4.42843
	DB12637	0.017	Onapristone	4.37654
	DB00557	0.003	Hydroxyzine	4.34597
	DB11743	0.004	Ipatasertib	4.13206
